# Supplementary material for: Efficient alkane hydroxylation catalysis of nickel(ii) complexes with oxazoline donor containing tripodal tetradentate ligands
Source: Royal Society of Chemistry journal article supplement (doi:10.1039/d0dt00733a), 2020-01-01
Supplement: d0dt00733a1.pdf [file d0dt00733a1.pdf]

*Supporting information for:*

**Efficient alkane hydroxylation catalysis of Nickel(II) complexes with oxazoline donor containing tripodal tetradentate ligands**

Ikumi Terao, Sena Horii, Jun Nakazawa, Masaya Okamura, Shiro Hikichi\*

Department of Material and Life Chemistry

Faculty of Engineering

Kanagawa University

3-27-1 Rokkakubashi, Kanagawa-ku, Yokohama 221-8686 (Japan)

Fax: +81-45-413-9770

\*E-mail: hikichi@kanagawa-u.ac.jp

**Contents**

Table S1 Cyclohexane-*d*<sub>12</sub> oxidation mediated by **1** and **7**

Table S2 Toluene oxidation mediated by **1** and **7**

Table S3 Crystallographic data for **1** – **5**

Fig. S1 UV-vis spectra of CH<sub>2</sub>Cl<sub>2</sub> solutions of **1** (a), **2** (b), **3** (c), **4** (d), **5** (e) and **6** (f)

Fig. S2 ESI-MS spectra of MeCN solutions of **1** (a), **2** (b), **3** (c), **4** (d), **5** (e) and **6** (f)

Fig. S3 IR spectra of KBr pellet of **1** (a), **2** (b), **3** (c), **4** (d), **5** (e) and **6** (f)

Fig. S4 <sup>1</sup>H NMR spectra of **1** (a), **2** (b), **4** (c), **5** (d) and **6** (e)

Fig. S5 Time course of total TON of the acetate complexes **1** and **7** on cyclohexane oxidation

Fig. S6 Differential pulse voltammograms of the acetate complexes **1** and **7** in MeCN with 0.1 M <sup>n</sup>Bu<sub>4</sub>NPF<sub>6</sub>

Fig. S7 Time course of total TON of the TOA<sup>Me2</sup> complexes **1** – **4** on cyclohexane oxidation

Fig. S8 Time course of total TON of the Tp\* and To<sup>M</sup> complexes **8** – **10** on cyclohexane oxidation

Fig. S9 Time course of total TON of the chlorido complexes **4** – **6** on cyclohexane oxidation

Fig. S10 Decay of the acylperoxido species in CH<sub>2</sub>Cl<sub>2</sub> (a) or CD<sub>2</sub>Cl<sub>2</sub> (b) at 25°C

Table S1 Cyclohexane-*d*<sub>12</sub> oxidation mediated by **1** and **7**

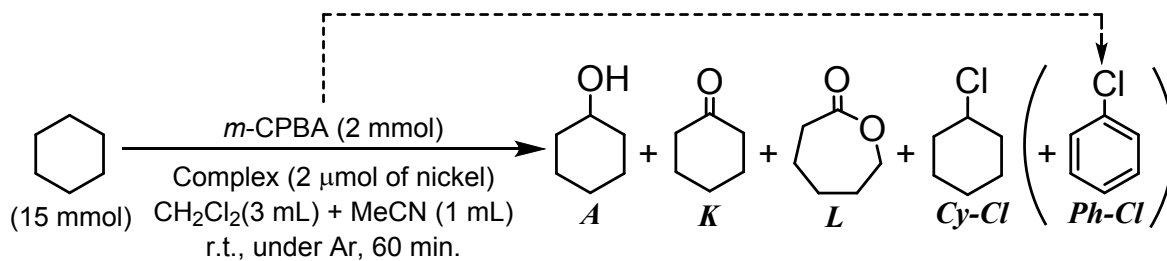

| Complex  | Substrate                      | Products / μmol |          |          |              |              | TON <sup>1</sup> | <i>A</i> /( <i>K</i> + <i>L</i> ) | KIE <sup>2</sup> |
|----------|--------------------------------|-----------------|----------|----------|--------------|--------------|------------------|-----------------------------------|------------------|
|          |                                | <i>A</i>        | <i>K</i> | <i>L</i> | <i>Cy-Cl</i> | <i>Ph-Cl</i> |                  |                                   |                  |
| <b>1</b> | C <sub>6</sub> H <sub>12</sub> | 1526.7          | 218.6    | 12.8     | 111.7        | 1056.7       | 995              | 6.6                               | 2.67             |
| <b>1</b> | C <sub>6</sub> D <sub>12</sub> | 571.5           | 69.2     | 36.0     | 63.2         | 430.8        | 423              | 5.4                               |                  |
| <b>7</b> | C <sub>6</sub> H <sub>12</sub> | 1197.8          | 110.5    | 59.5     | 119.3        | 771.1        | 829              | 7.0                               | 3.74             |
| <b>7</b> | C <sub>6</sub> D <sub>12</sub> | 320.3           | 93.9     | 16.7     | 199.3        | 280.1        | 370              | 2.9                               |                  |

<sup>1</sup> TON = (*A* + 2×*K* + 2×*L* + *Cy-Cl*) / Ni

<sup>2</sup> KIE = *A* from C<sub>6</sub>H<sub>12</sub> / *A* from C<sub>6</sub>D<sub>12</sub>

Table S2 Toluene oxidation mediated by **1** and **7**

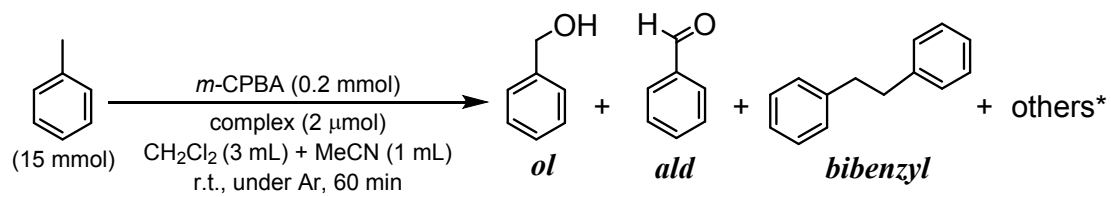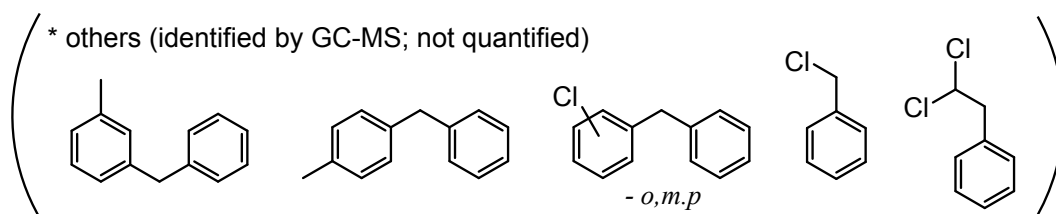

| Complex  | Products / $\mu\text{mol}$ |            |                 |
|----------|----------------------------|------------|-----------------|
|          | <i>ol</i>                  | <i>ald</i> | <i>bibenzyl</i> |
| <b>1</b> | 9.4                        | 14.9       | <b>36.7</b>     |
| <b>7</b> | 7.6                        | 6.6        | 3.1             |

**Table S3.** Crystallographic data for **1 - 5**.

| complex                                              | <b>1</b>                                                         | <b>2·2CH<sub>2</sub>Cl<sub>2</sub></b>                                           | <b>3</b>                                                           |
|------------------------------------------------------|------------------------------------------------------------------|----------------------------------------------------------------------------------|--------------------------------------------------------------------|
| Formula                                              | C <sub>44</sub> H <sub>53</sub> BN <sub>4</sub> NiO <sub>5</sub> | C <sub>44</sub> H <sub>54</sub> BCl <sub>4</sub> N <sub>5</sub> NiO <sub>6</sub> | C <sub>49</sub> H <sub>56</sub> BClN <sub>4</sub> NiO <sub>6</sub> |
| Formula Weight                                       | 787.42                                                           | 960.24                                                                           | 901.93                                                             |
| Space Group                                          | <i>P</i> -1 (No. 2)                                              | <i>P</i> 2 <sub>1</sub> / <i>n</i> (No. 14)                                      | <i>F</i> dd2 (No. 43)                                              |
| Crystal System                                       | triclinic                                                        | monoclinic                                                                       | orthorhombic                                                       |
| <i>a</i> / Å                                         | 11.790(6)                                                        | 14.544(5)                                                                        | 63.3792(17)                                                        |
| <i>b</i> / Å                                         | 13.799(6)                                                        | 11.405(4)                                                                        | 58.8576(15)                                                        |
| <i>c</i> / Å                                         | 15.362(7)                                                        | 28.205(10)                                                                       | 9.7929(2)                                                          |
| <i>α</i> / °                                         | 64.129(15)                                                       | 90                                                                               | 90                                                                 |
| <i>β</i> / °                                         | 83.65(2)                                                         | 102.024(4)                                                                       | 90                                                                 |
| <i>γ</i> / °                                         | 81.82(2)                                                         | 90                                                                               | 90                                                                 |
| <i>V</i> / Å <sup>3</sup>                            | 2222.6(18)                                                       | 4576(3)                                                                          | 36530.9(15)                                                        |
| <i>Z</i>                                             | 2                                                                | 4                                                                                | 32                                                                 |
| <i>F</i> (000)                                       | 836                                                              | 2008                                                                             | 15232                                                              |
| <i>D</i> (calcd) / g·cm <sup>-3</sup>                | 1.177                                                            | 1.394                                                                            | 1.312                                                              |
| Temp./K                                              | 293(2)                                                           | 113(2)                                                                           | 113(2)                                                             |
| <i>μ</i> (MoK <sub>α</sub> ) / cm <sup>-1</sup>      | 4.82                                                             | 7.10                                                                             | 5.37                                                               |
| 2 <i>θ</i> <sub>max</sub> / °                        | 54.898                                                           | 54.968                                                                           | 54.962                                                             |
| Measured reflections                                 | 9293                                                             | 10430                                                                            | 20846                                                              |
| Observed reflections<br>( <i>I</i> > 2σ( <i>I</i> )) | 6613                                                             | 7617                                                                             | 19997                                                              |
| Parameters                                           | 496                                                              | 565                                                                              | 1145                                                               |
| R ( <i>I</i> > 2σ( <i>I</i> ) / all <sup>(a)</sup> ) | 0.0437 / 0.0618                                                  | 0.0661 / 0.0807                                                                  | 0.0370 / 0.0394                                                    |
| wR                                                   | 0.1589                                                           | 0.1974                                                                           | 0.0770                                                             |
| Goodness of fit <i>S</i> <sup>(b)</sup>              | 0.725                                                            | 1.040                                                                            | 1.152                                                              |

(a)  $R = \sum ||F_o| - |F_c|| / \sum |F_o|$ .  $R_w = \{\sum [w(F_o^2 - F_c^2)^2] / \sum [w(F_o^2)^2]\}^{1/2}$ . (b)  $S = \{\sum [w(F_o^2 - F_c^2)^2] / (n - p)\}^{1/2}$ , where *n* is the number of reflections and *p* is the total number of parameters refined.

**Table S3.** (continued)

| complex                                              | <b>4</b>                                                                         | <b>5</b>                                                           |
|------------------------------------------------------|----------------------------------------------------------------------------------|--------------------------------------------------------------------|
| Formula                                              | C <sub>42</sub> H <sub>50</sub> B <sub>1</sub> ClN <sub>4</sub> NiO <sub>3</sub> | C <sub>48</sub> H <sub>62</sub> BClN <sub>4</sub> NiO <sub>3</sub> |
| Formula Weight                                       | 763.83                                                                           | 847.98                                                             |
| Space Group                                          | <i>P2<sub>1</sub>/c</i> (No. 14)                                                 | <i>P2<sub>1</sub></i> (No. 4)                                      |
| Crystal System                                       | monoclinic                                                                       | monoclinic                                                         |
| <i>a</i> / Å                                         | 14.905(7)                                                                        | 12.0793(6)                                                         |
| <i>b</i> / Å                                         | 24.920(12)                                                                       | 13.4525(5)                                                         |
| <i>c</i> / Å                                         | 10.988(5)                                                                        | 15.1350(6)                                                         |
| <i>α</i> / °                                         | 90                                                                               | 90                                                                 |
| <i>β</i> / °                                         | 102.752(4)                                                                       | 111.020(2)                                                         |
| <i>γ</i> / °                                         | 90                                                                               | 90                                                                 |
| <i>V</i> / Å <sup>3</sup>                            | 3981(3)                                                                          | 2295.73(17)                                                        |
| <i>Z</i>                                             | 4                                                                                | 2                                                                  |
| <i>F</i> (000)                                       | 1616                                                                             | 904                                                                |
| <i>D</i> (calcd) / g·cm <sup>-3</sup>                | 1.275                                                                            | 1.227                                                              |
| Temp./K                                              | 113(2)                                                                           | 133(2)                                                             |
| <i>μ</i> (MoK <sub>α</sub> ) / cm <sup>-1</sup>      | 5.97                                                                             | 5.25                                                               |
| 2 <i>θ</i> <sub>max</sub> / °                        | 54.606                                                                           | 54.962                                                             |
| Measured reflections                                 | 8761                                                                             | 9223                                                               |
| Observed reflections<br>( <i>I</i> > 2σ( <i>I</i> )) | 6909                                                                             | 7510                                                               |
| Parameters                                           | 476                                                                              | 532                                                                |
| R ( <i>I</i> > 2σ( <i>I</i> ) / all <sup>(a)</sup> ) | 0.0667 / 0.0788                                                                  | 0.0214 / 0.0246                                                    |
| wR                                                   | 0.1957                                                                           | 0.0438                                                             |
| Goodness of fit <i>S</i> <sup>(b)</sup>              | 1.077                                                                            | 0.892                                                              |

(a)  $R = \frac{\sum ||F_o| - |F_c||}{\sum |F_o|}$ .  $R_w = \left\{ \frac{\sum [w(F_o^2 - F_c^2)^2]}{\sum [w(F_o^2)^2]} \right\}^{1/2}$ . (b)  $S = \left\{ \frac{\sum [w(F_o^2 - F_c^2)^2]}{(n - p)} \right\}^{1/2}$ , where *n* is the number of reflections and *p* is the total number of parameters refined.

(a) Complex 1

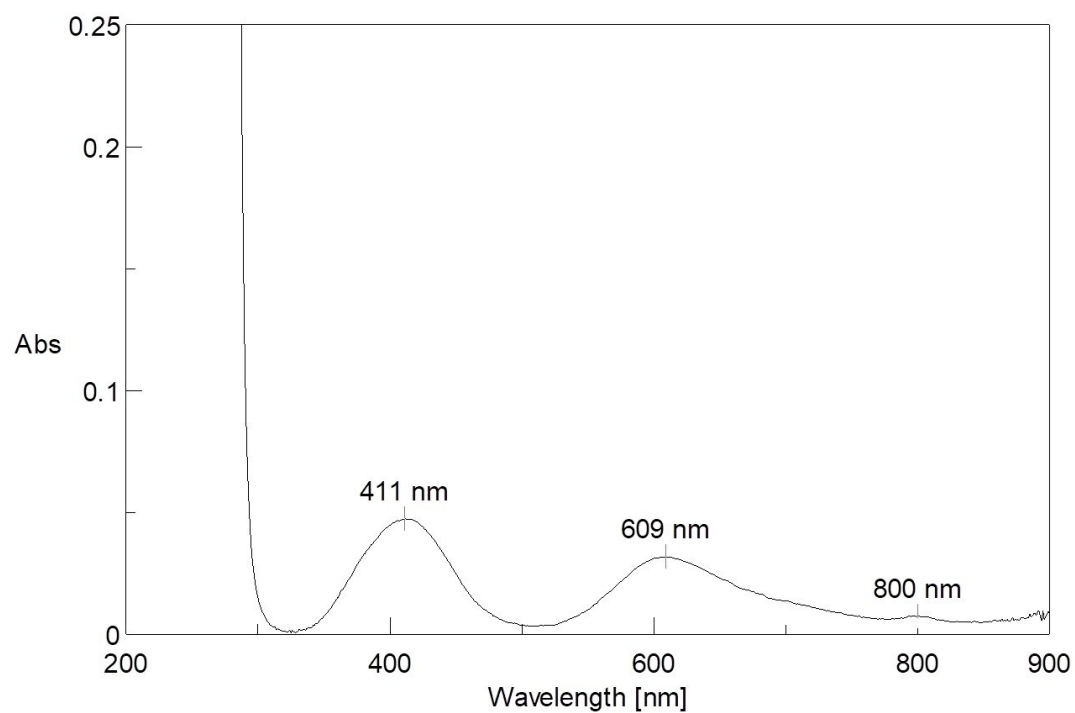

(b) Complex 2

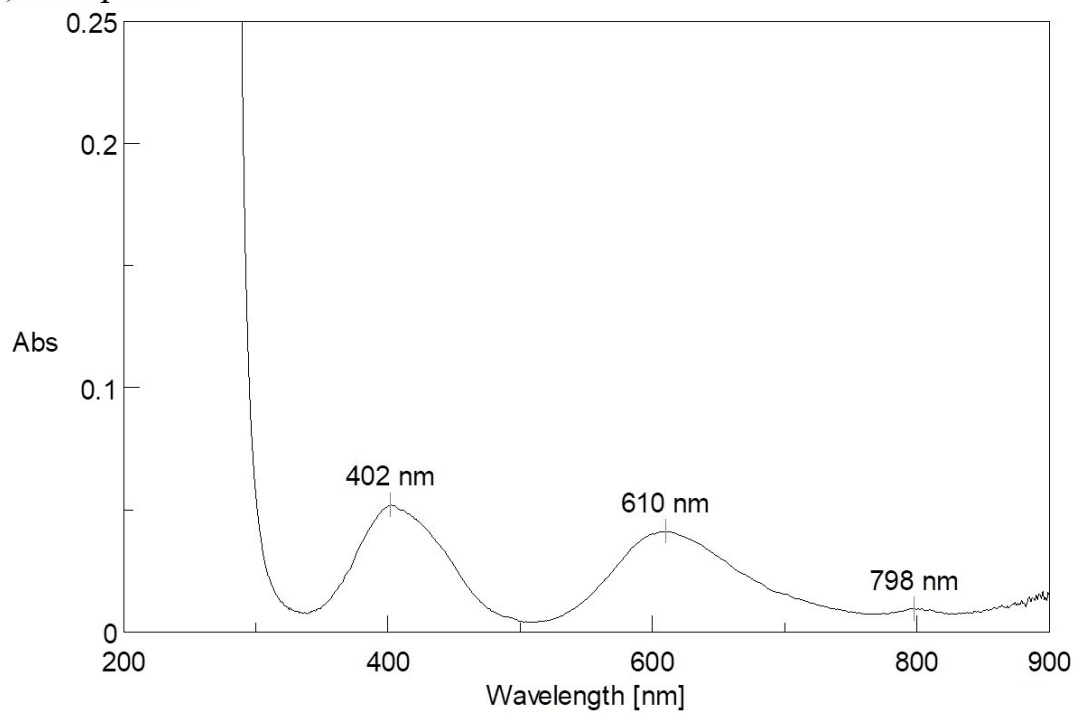

Fig. S1 UV-vis spectra of  $\text{CH}_2\text{Cl}_2$  solutions of **1** (a), **2** (b), **3** (c), **4** (d), **5** (e) and **6** (f).

(c) Complex 3

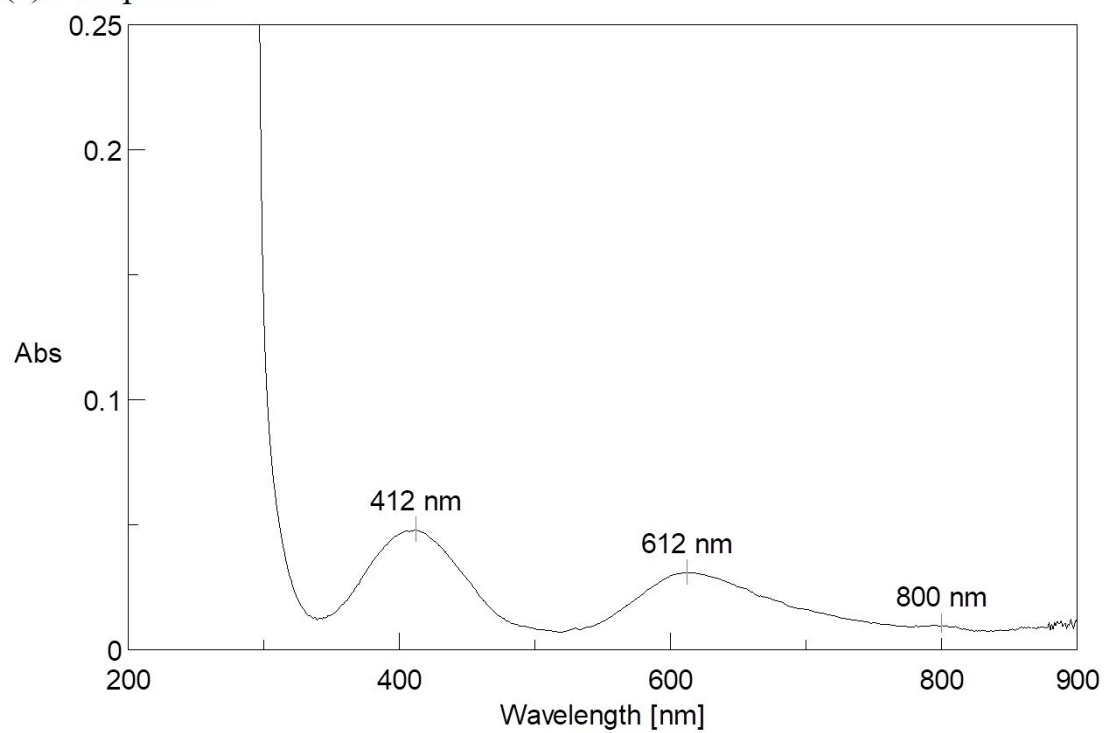

(d) Complex 4

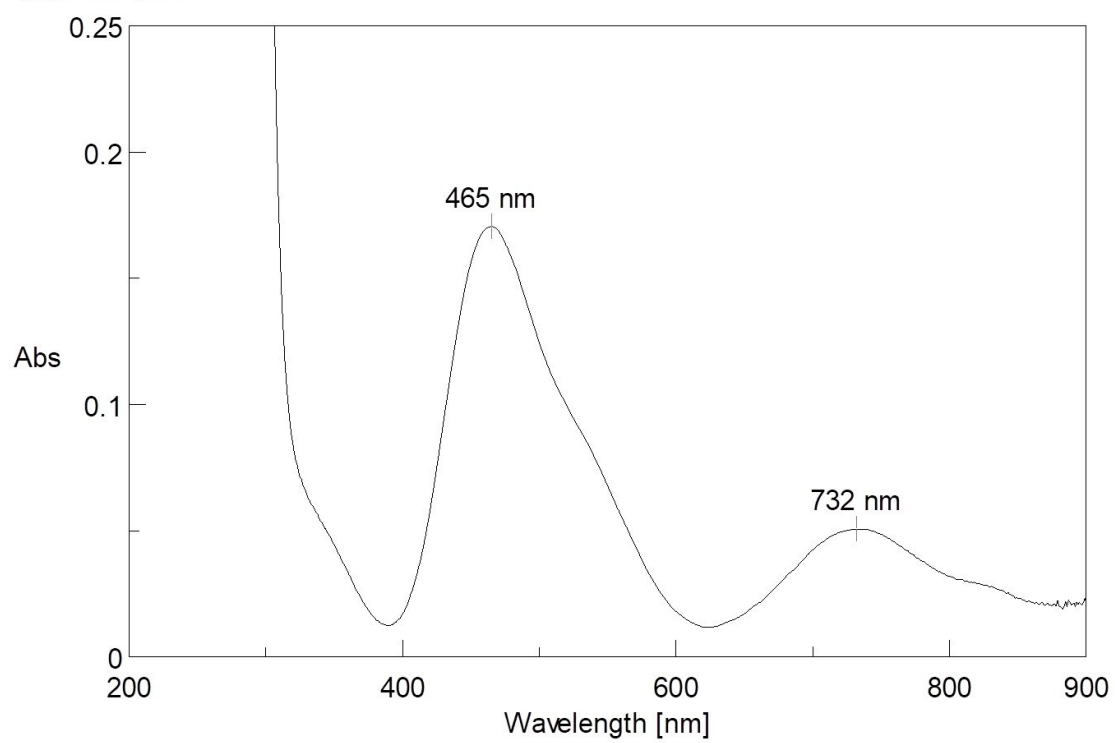

Fig. S1 (continued)

(e) Complex **5**

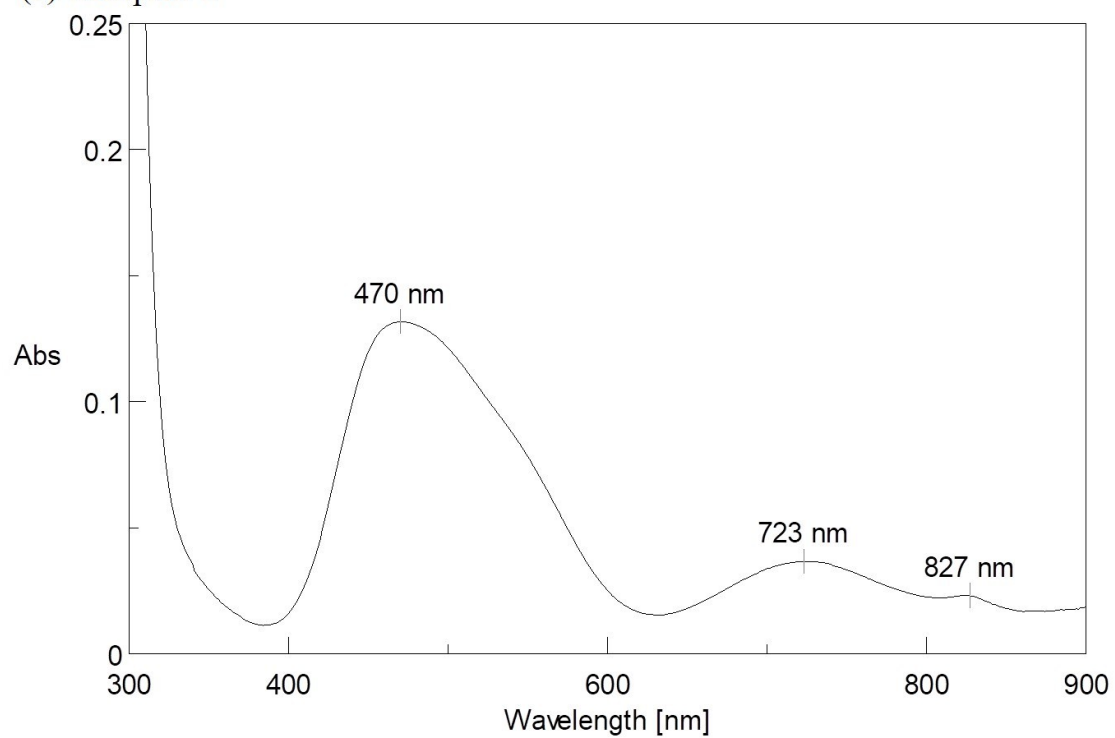

(f) Complex **6**

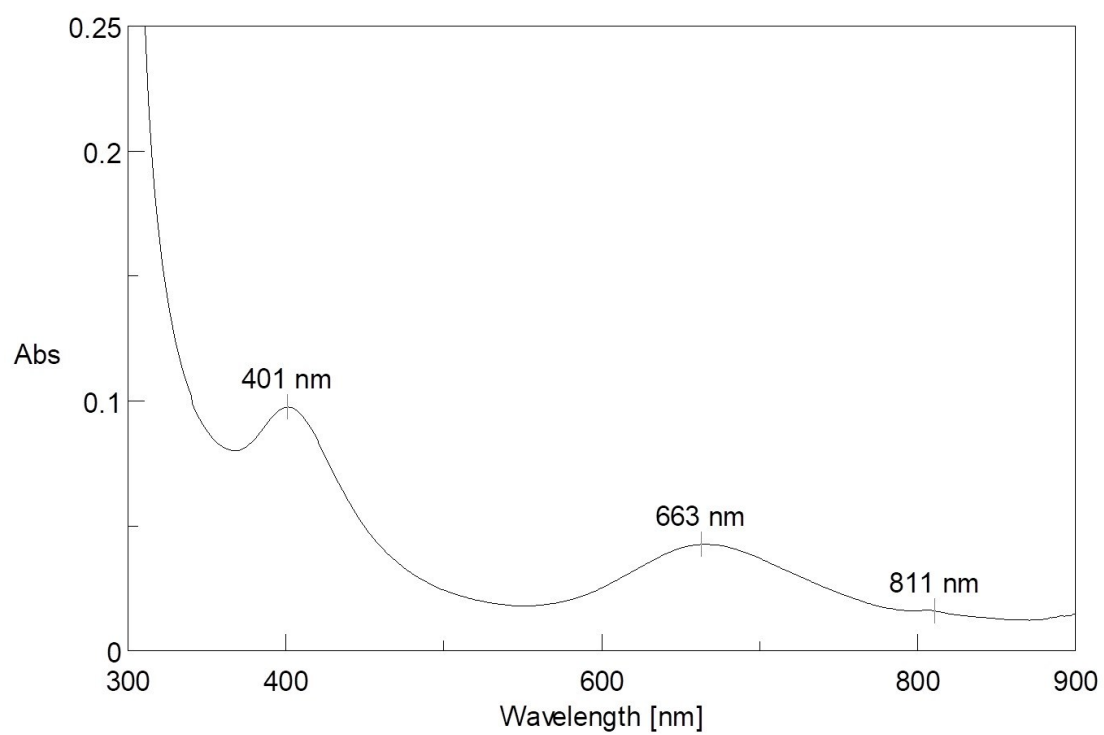

Fig. S1 (continued)



(a) Complex 1

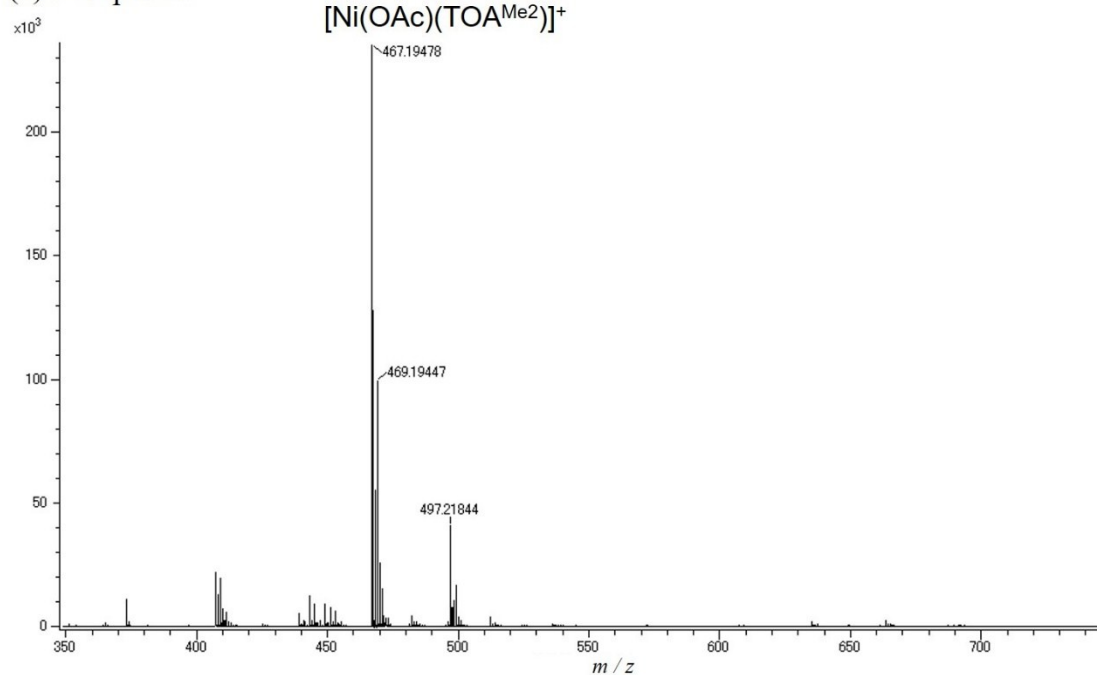

(b) Complex 2

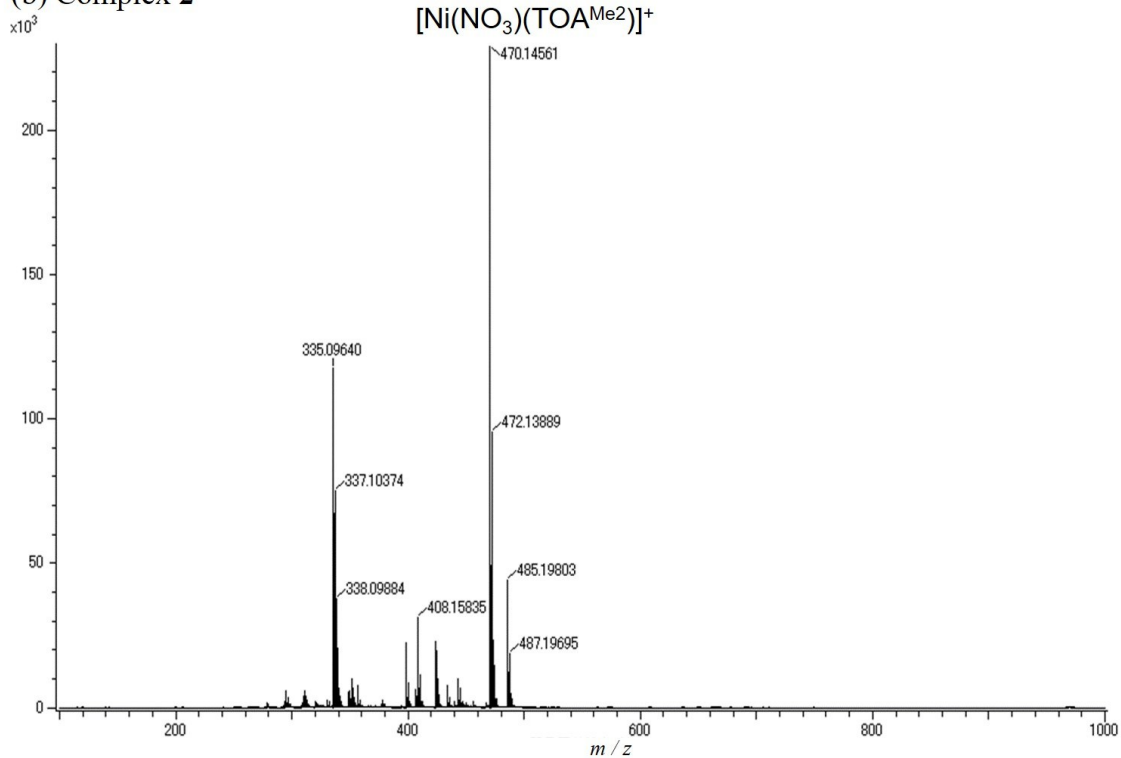

Fig. S2 ESI-MS spectra of MeCN solutions of **1** (a), **2** (b), **3** (c), **4** (d), **5** (e) and **6** (f).

(c) Complex 3

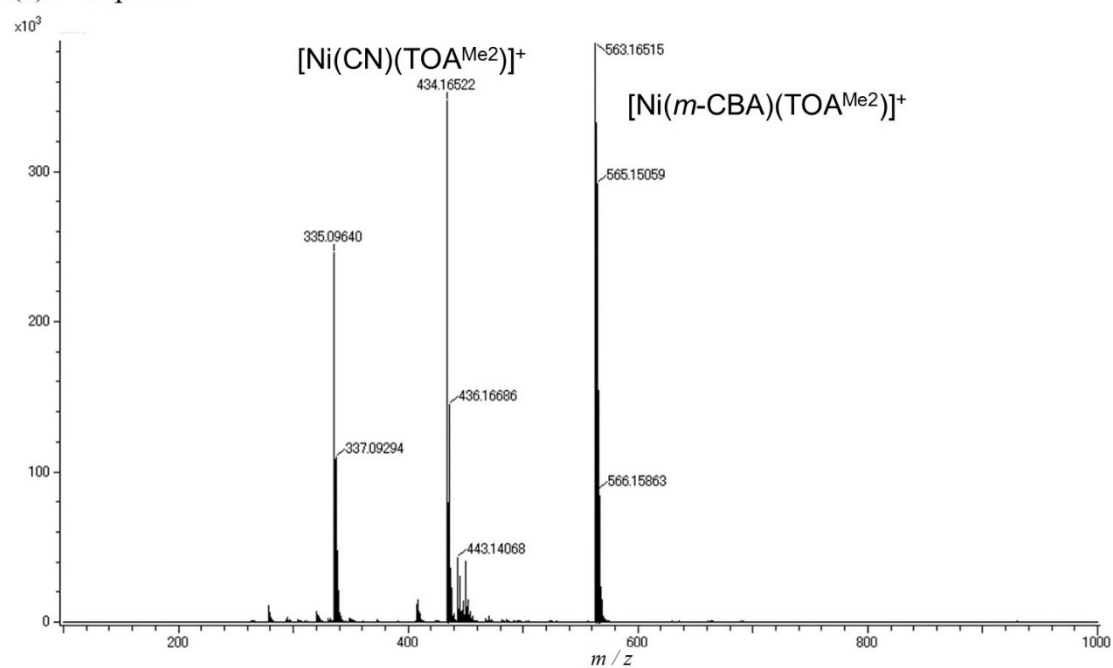

(d) Complex 4

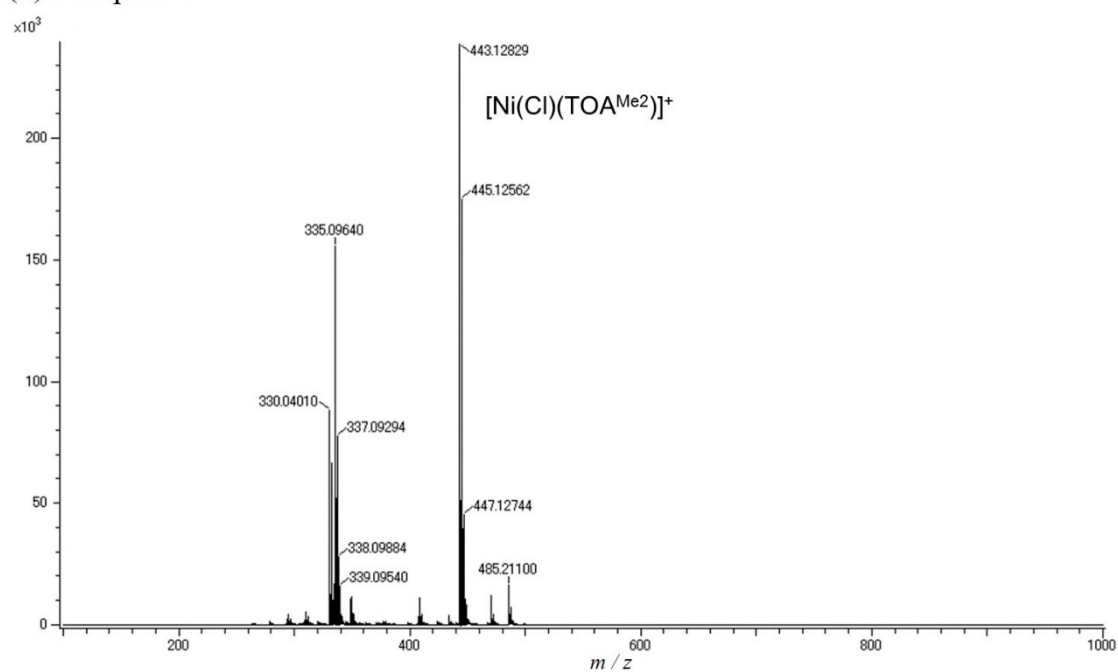

Fig. S2 (continued)

(e) Complex 5

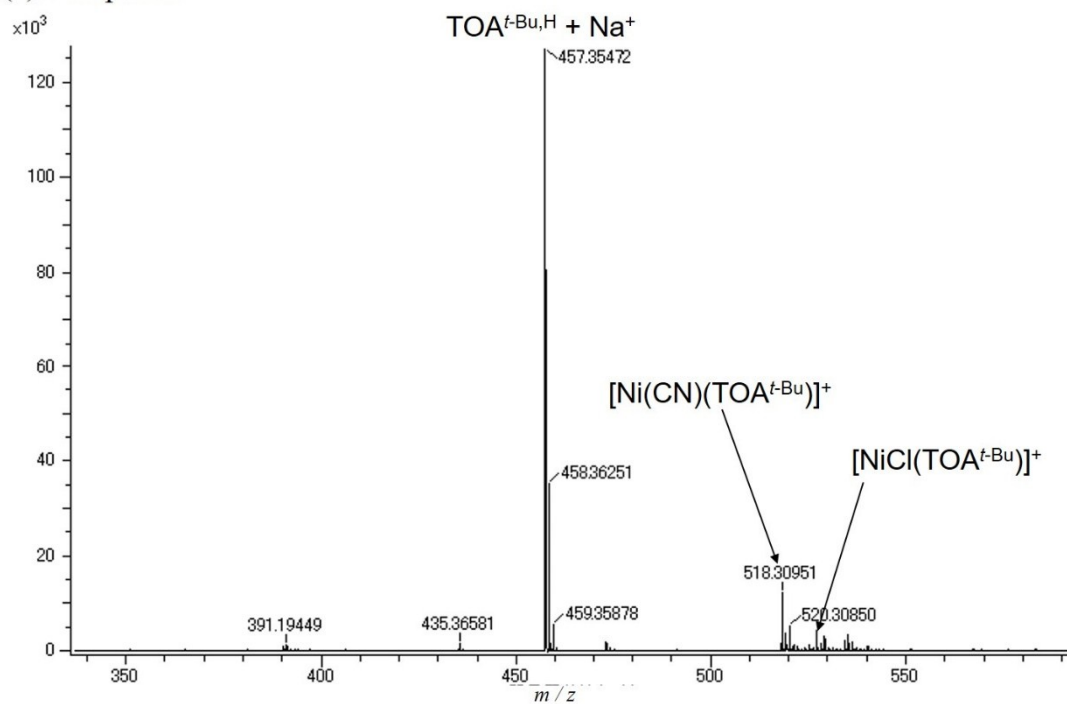

(f) Complex 6

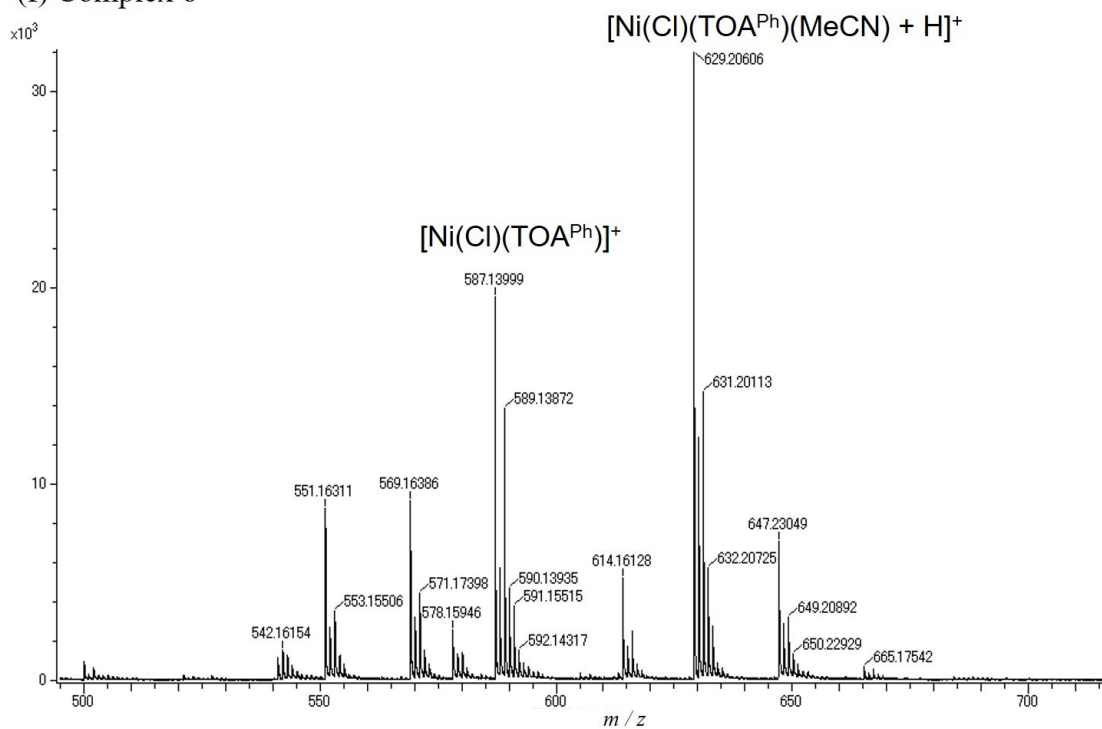

Fig. S2 (continued)

(a) Complex 1

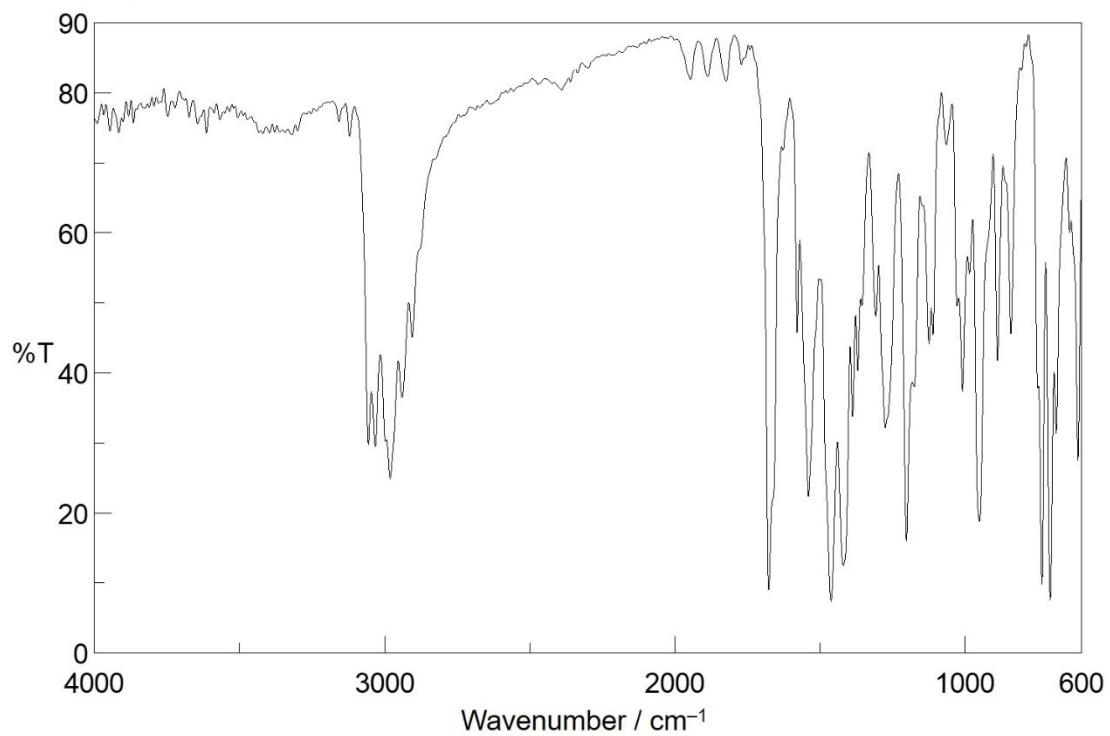

(b) Complex 2

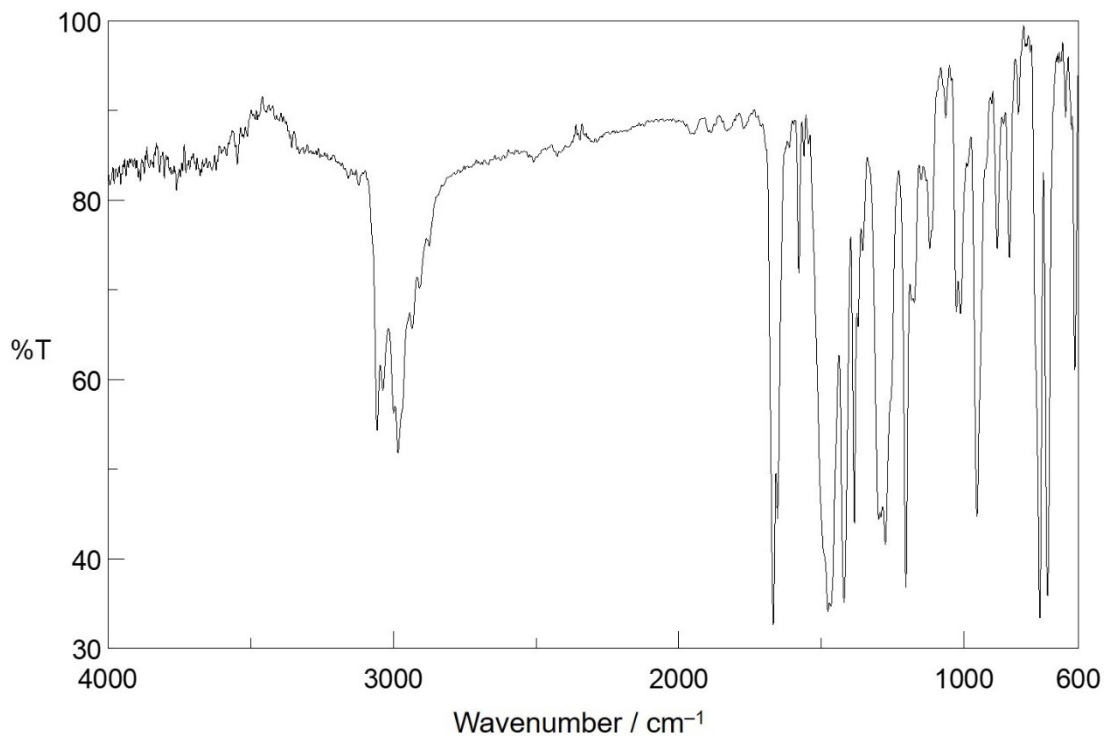

Fig. S3 IR spectra of KBr pellet of **1** (a), **2** (b), **3** (c), **4** (d), **5** (e) and **6** (f)

(c) Complex 3

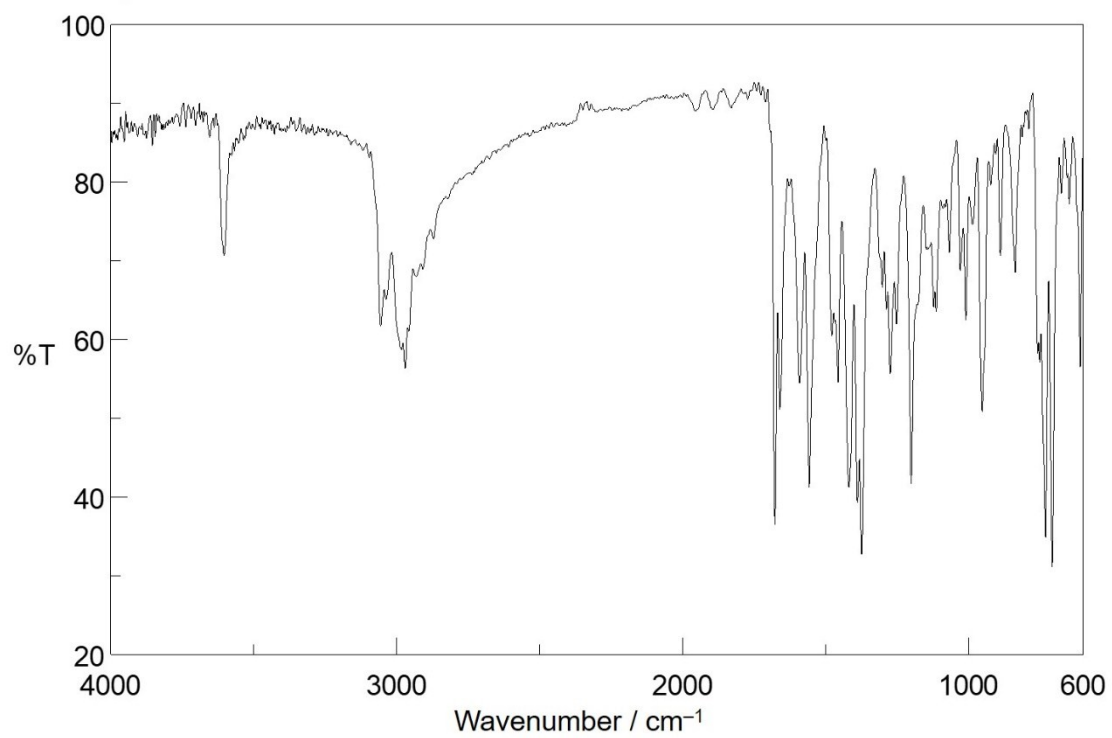

(d) Complex 4

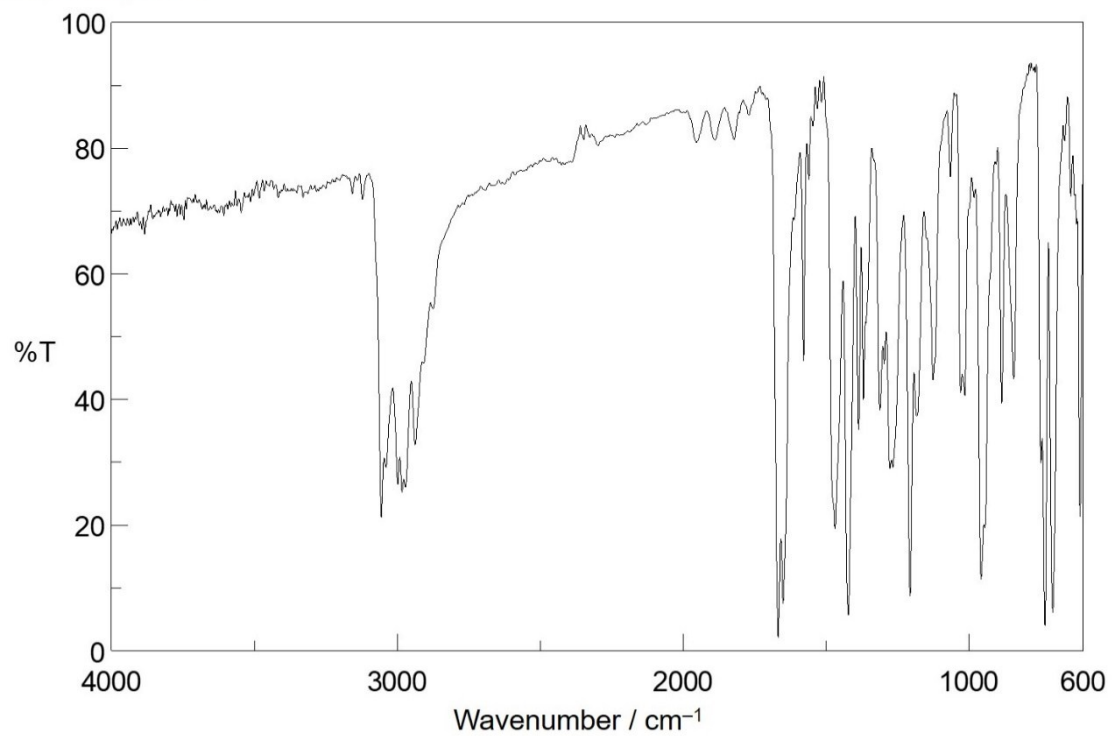

Fig. S3 (continued)

(e) Complex 5

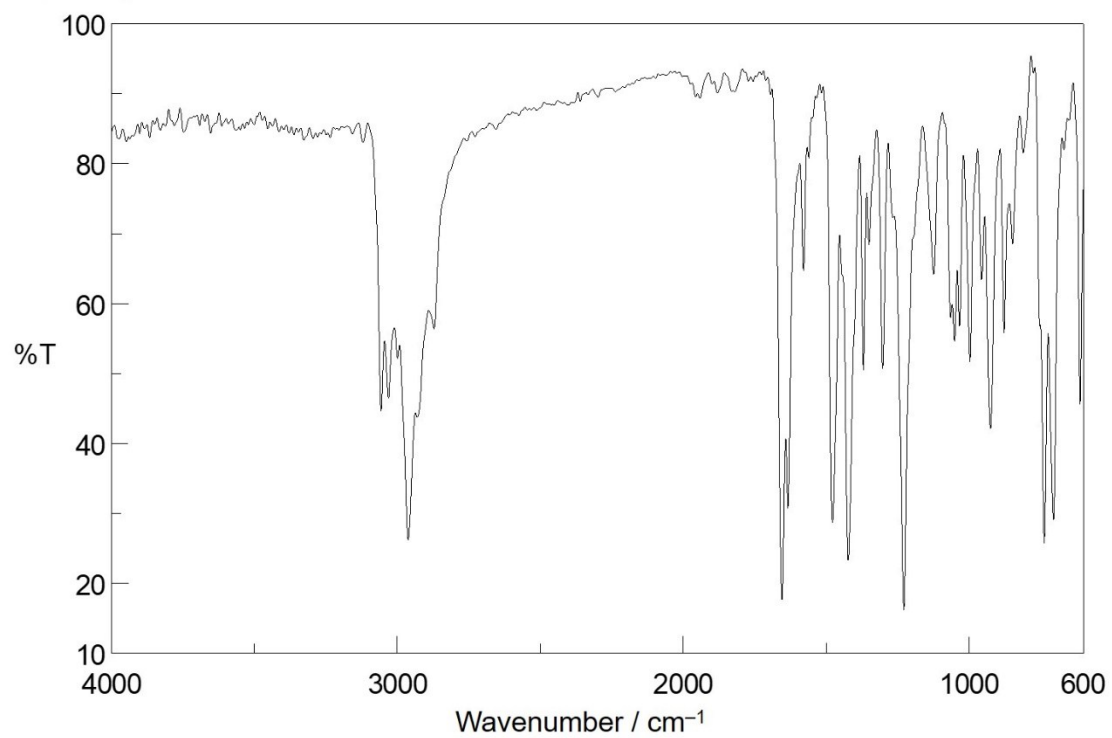

(f) Complex 6

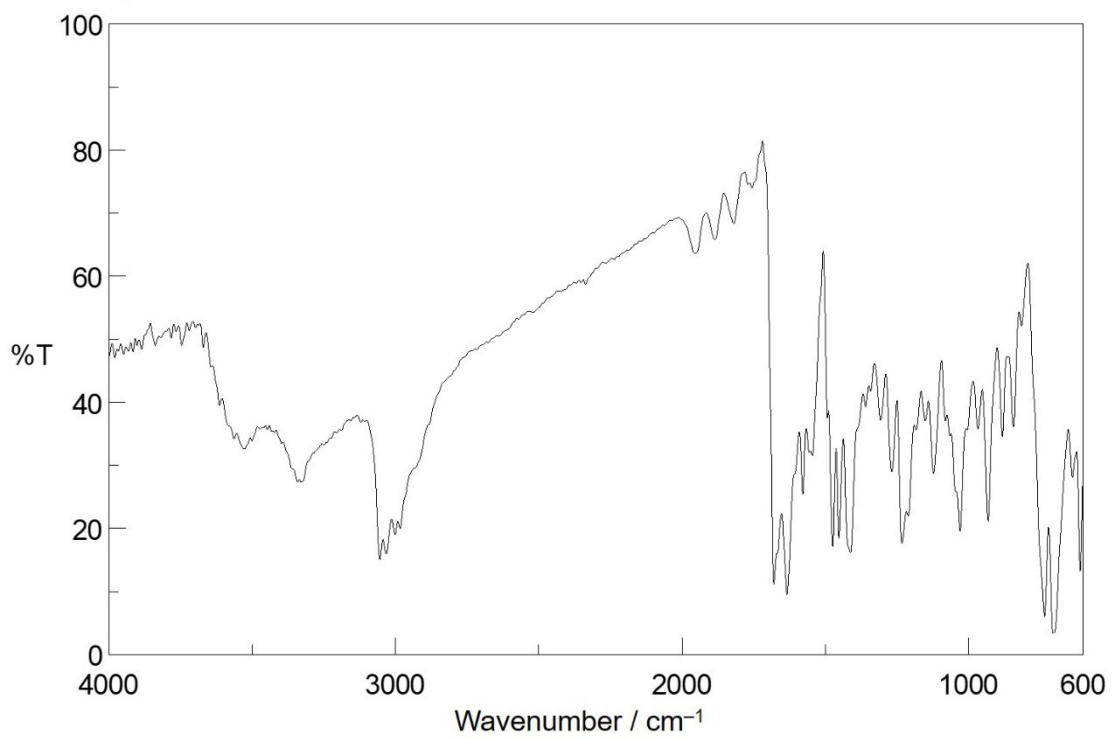

Fig. S3 (continued)

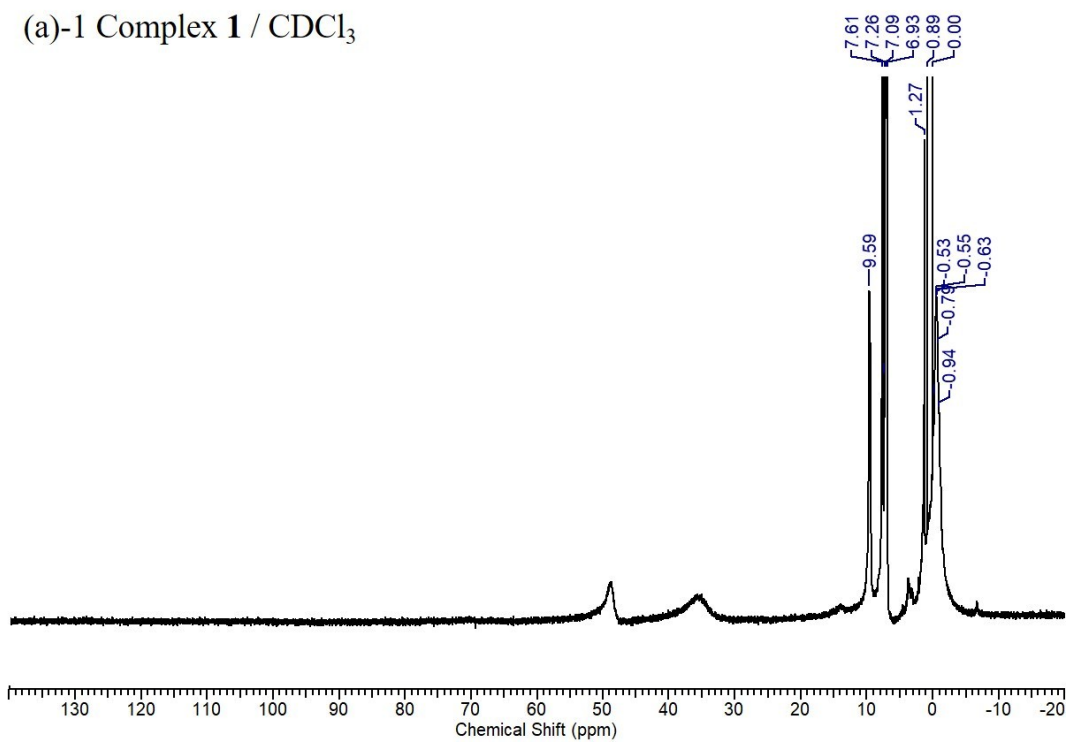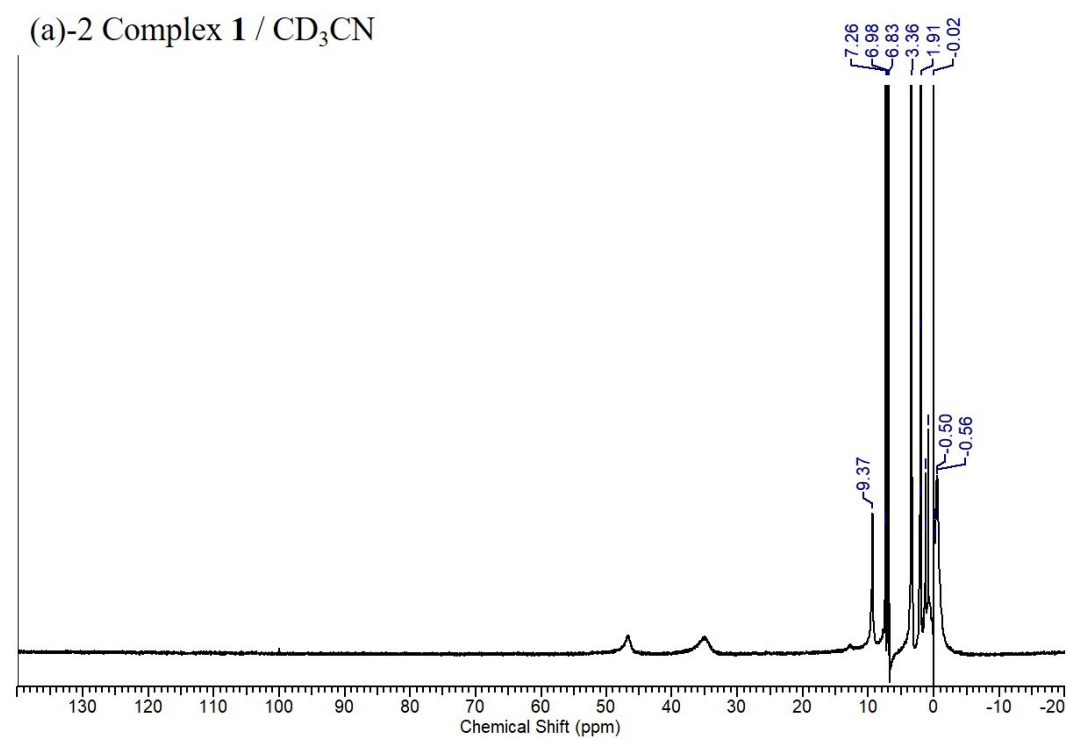

Fig. S4 <sup>1</sup>H NMR spectra of KBr pellet of **1** (a), **2** (b), **4** (c), **5** (d) and **6** (e)

(b)-1 Complex **2** / CDCl<sub>3</sub>

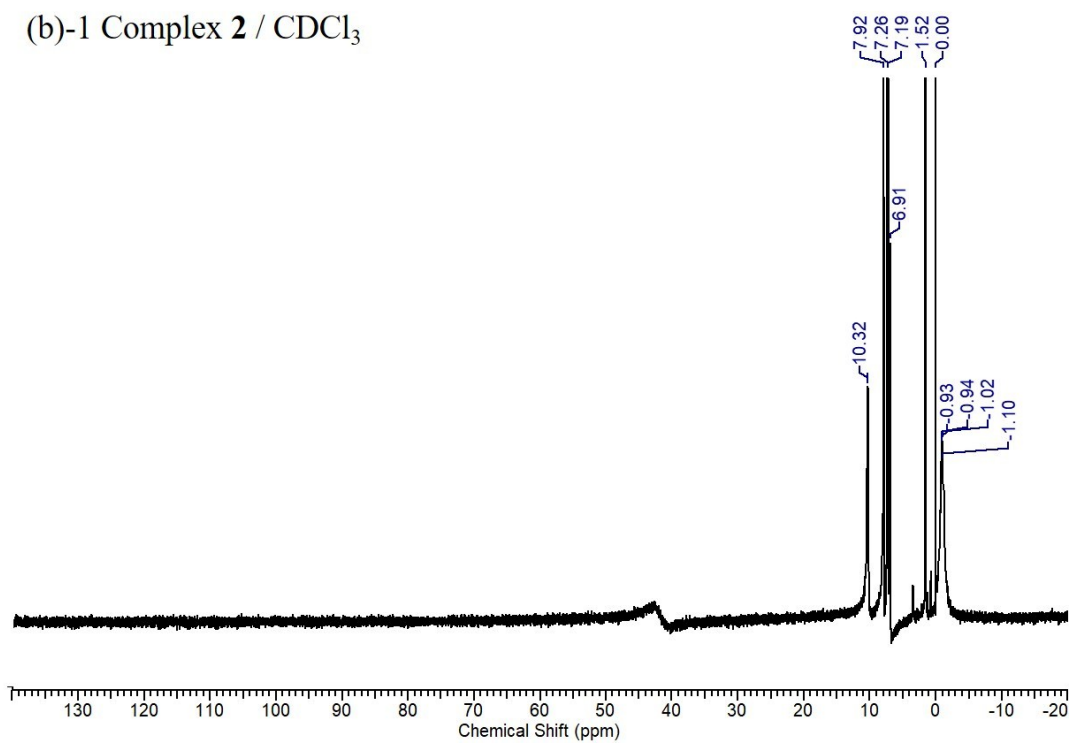

(b)-2 Complex **2** / CD<sub>3</sub>CN

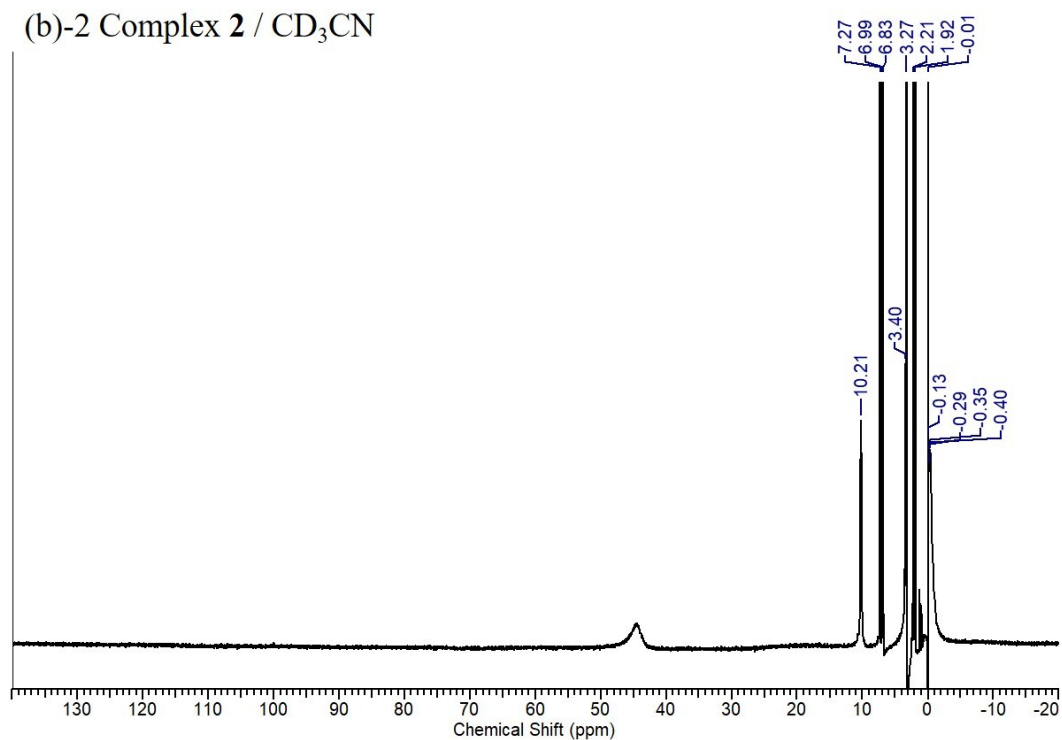

Fig. S4 (continued)



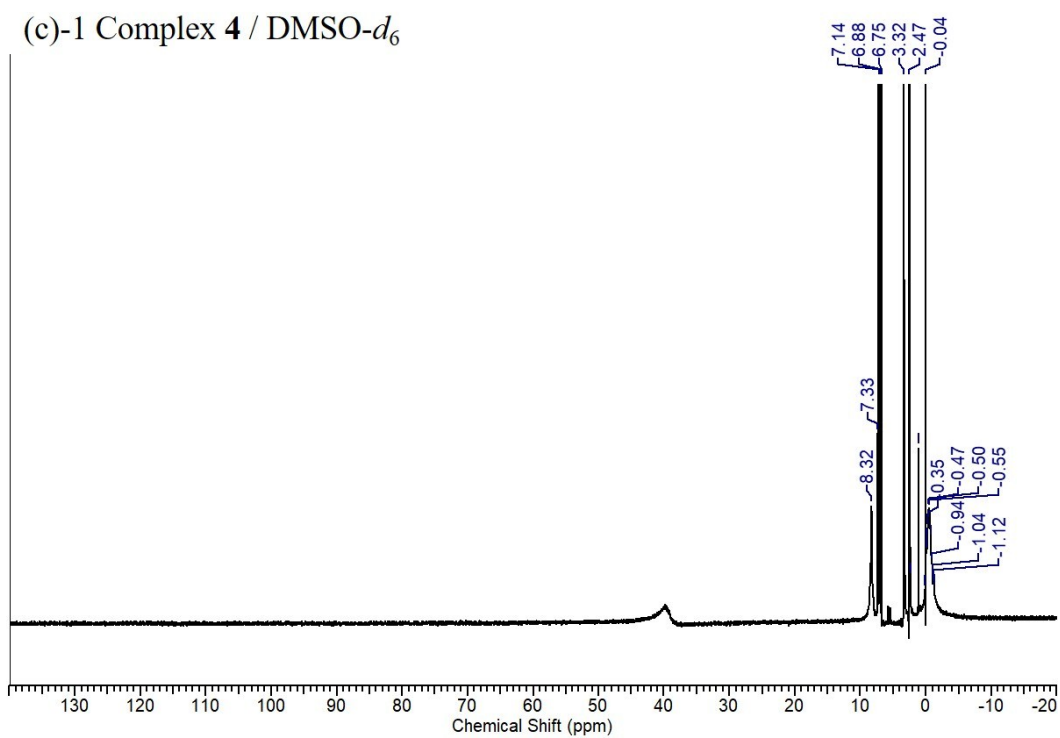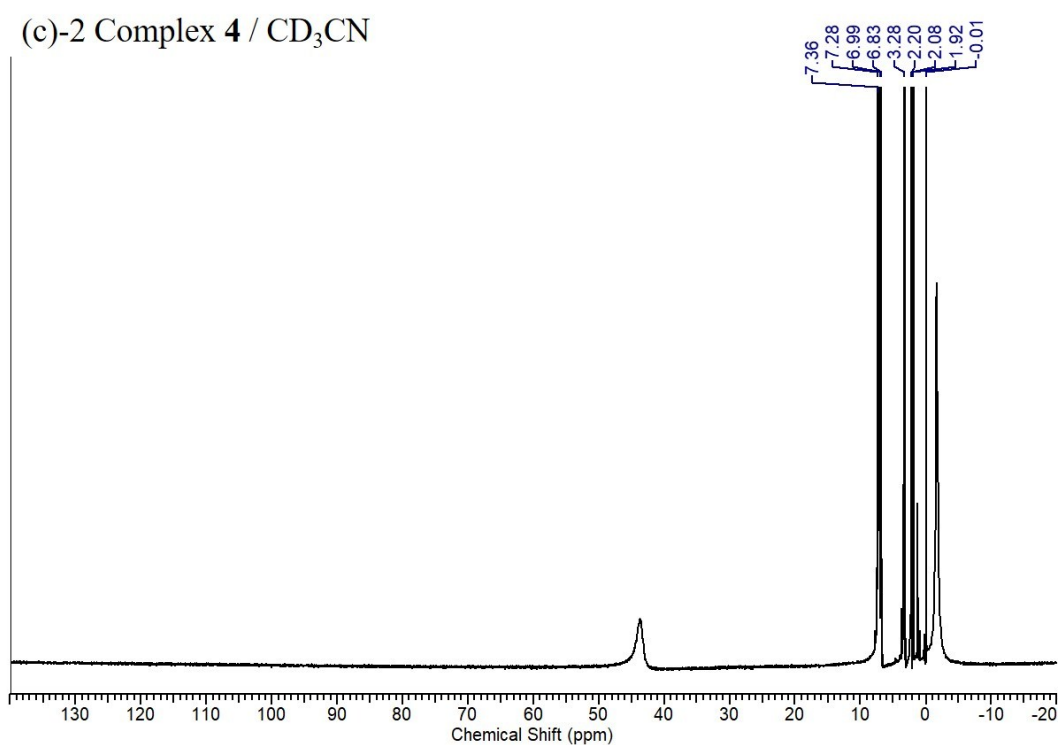

Fig. S4 (continued)

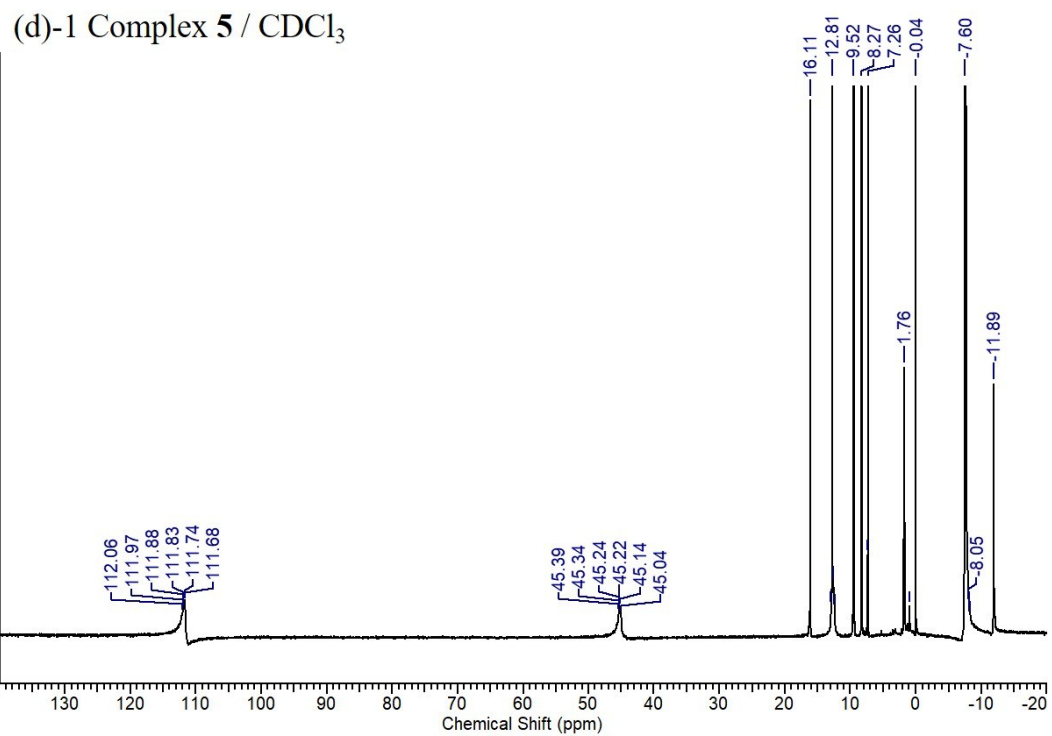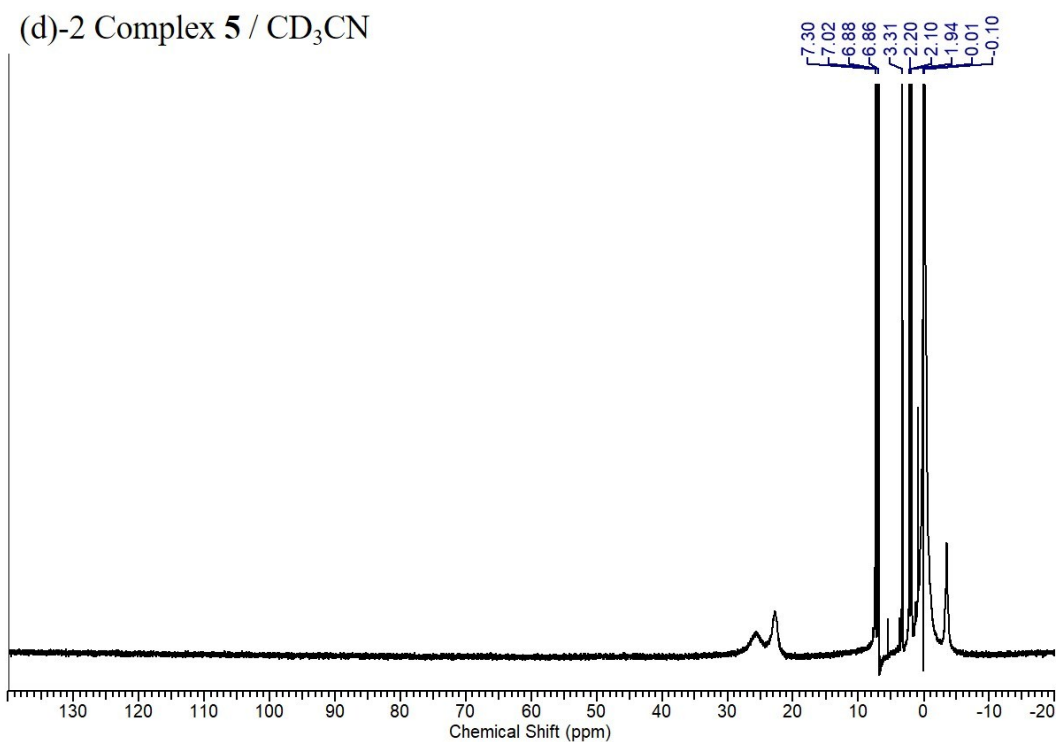

Fig. S4 (continued)

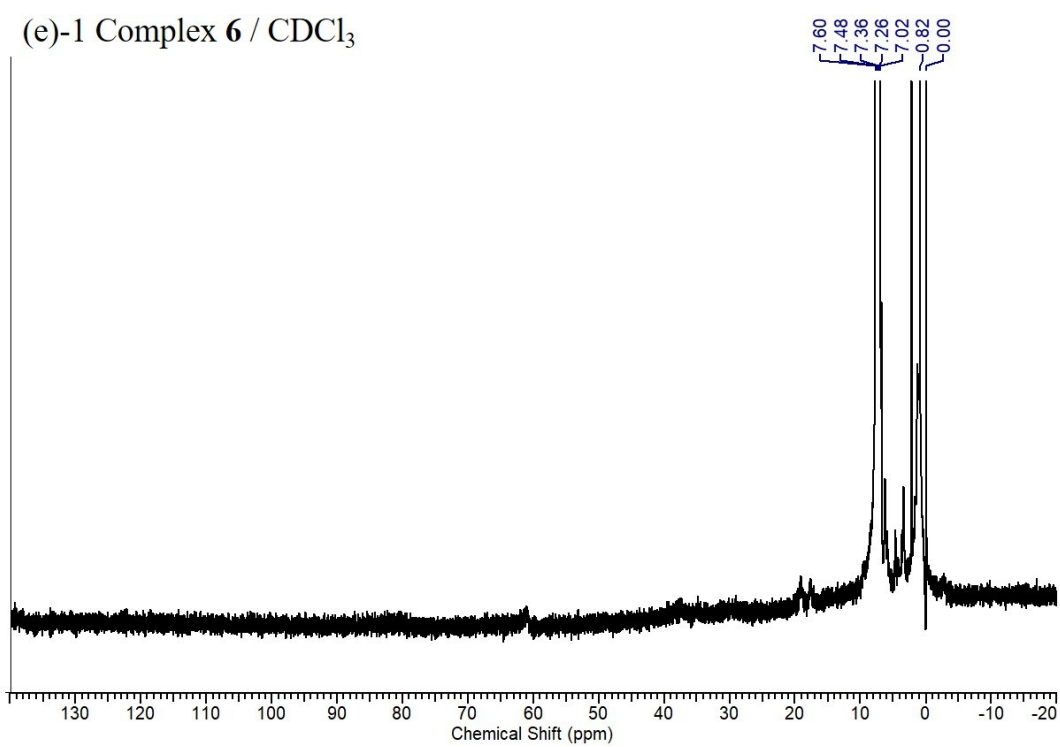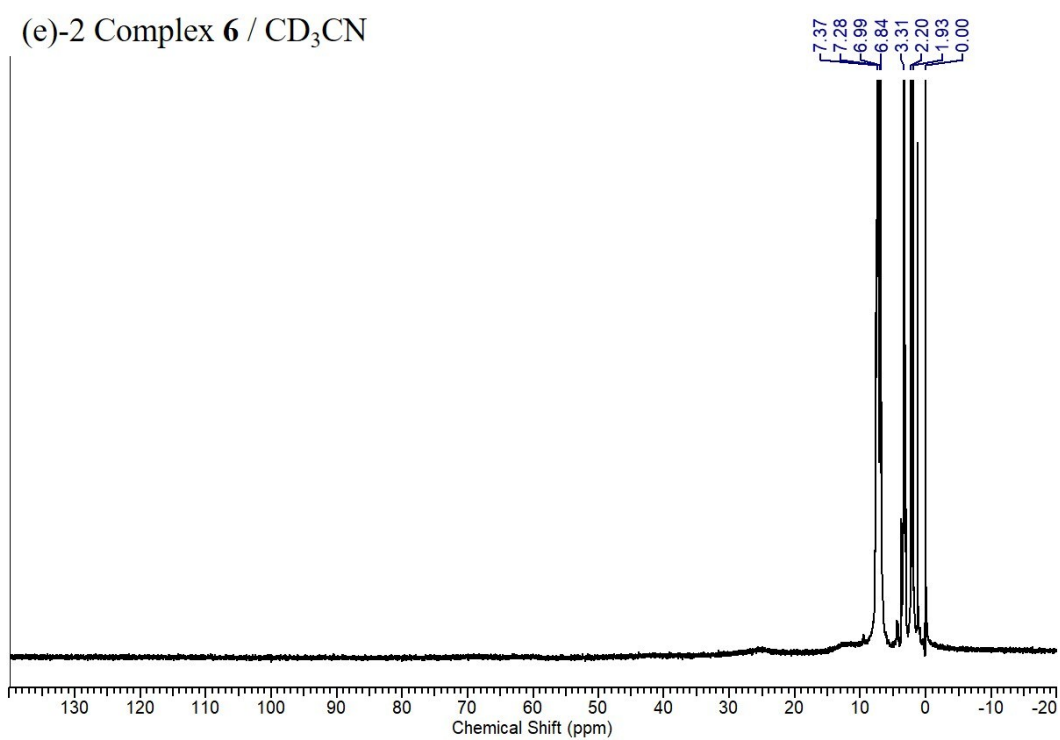

Fig. S4 (continued)

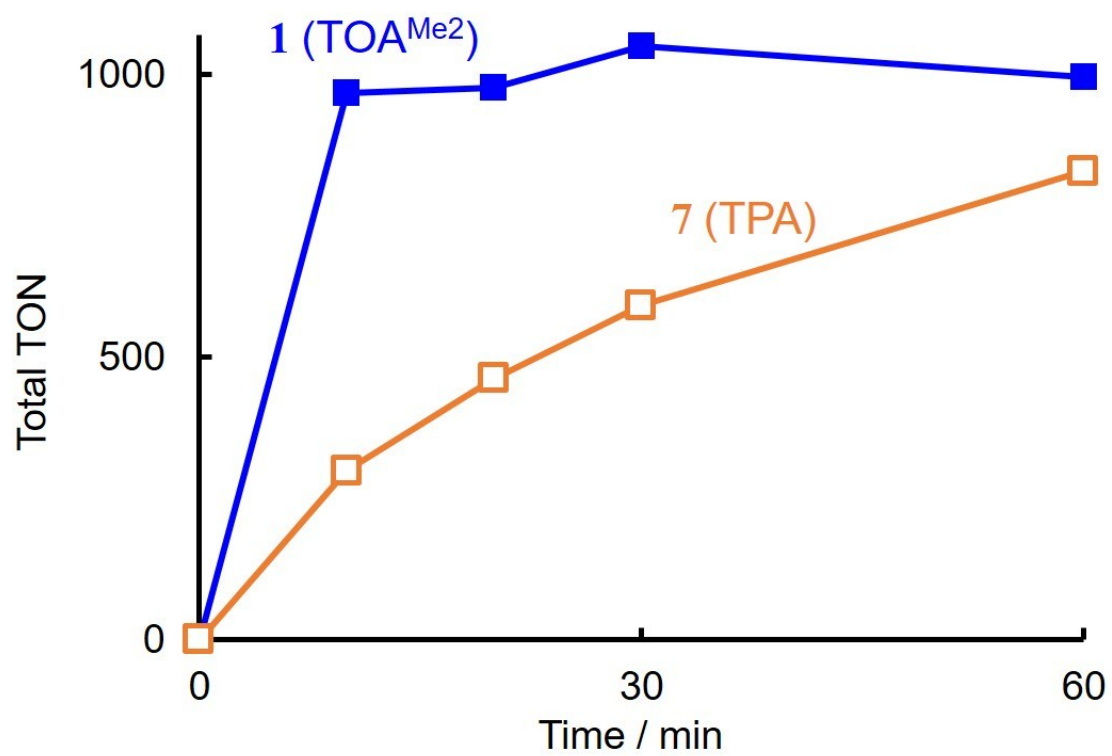

Fig. S5 Time course of total TON of the acetate complexes **1** and **7** on cyclohexane oxidation

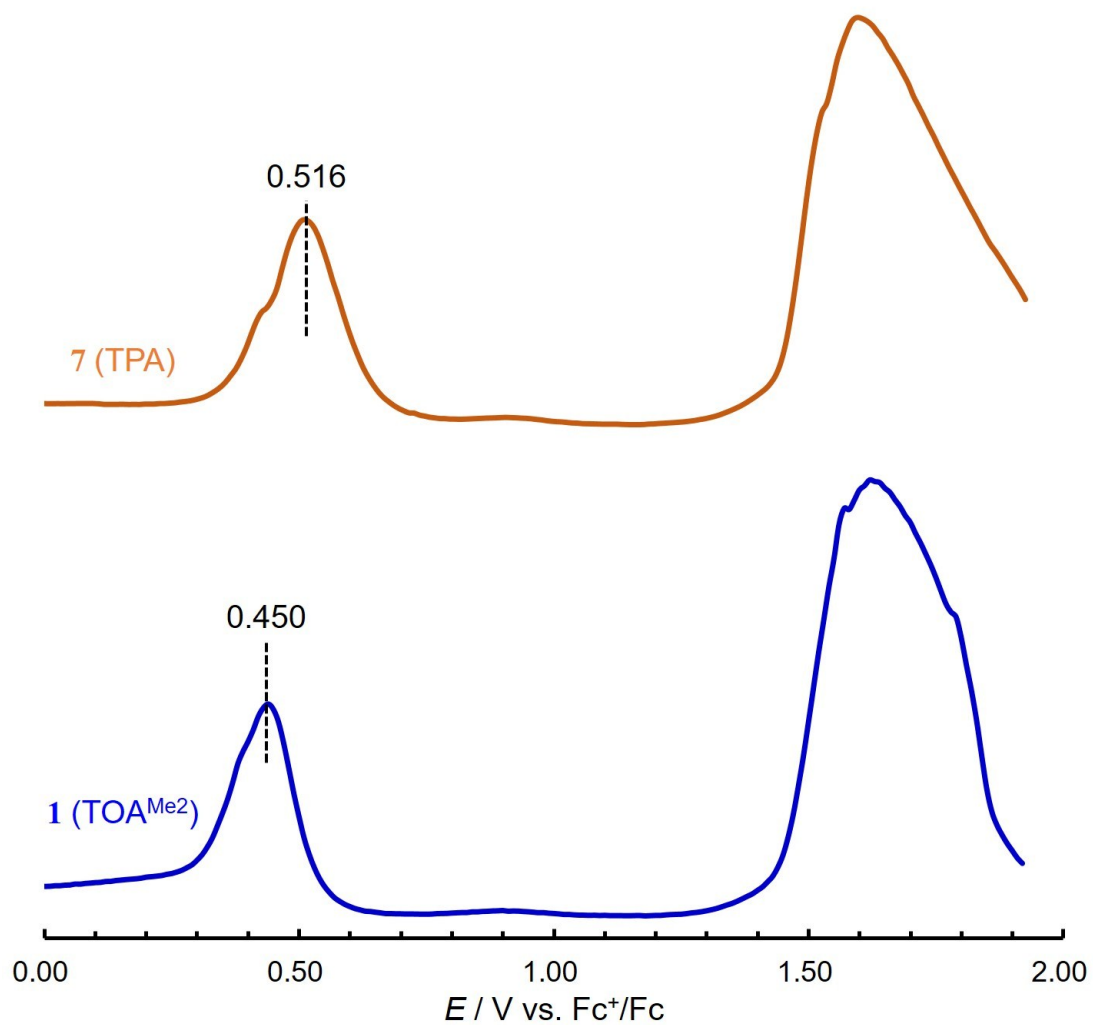

Fig. S6 Differential pulse voltammograms of the acetate complexes **1** and **7** in MeCN with 0.1 M  $n\text{Bu}_4\text{NPF}_6$

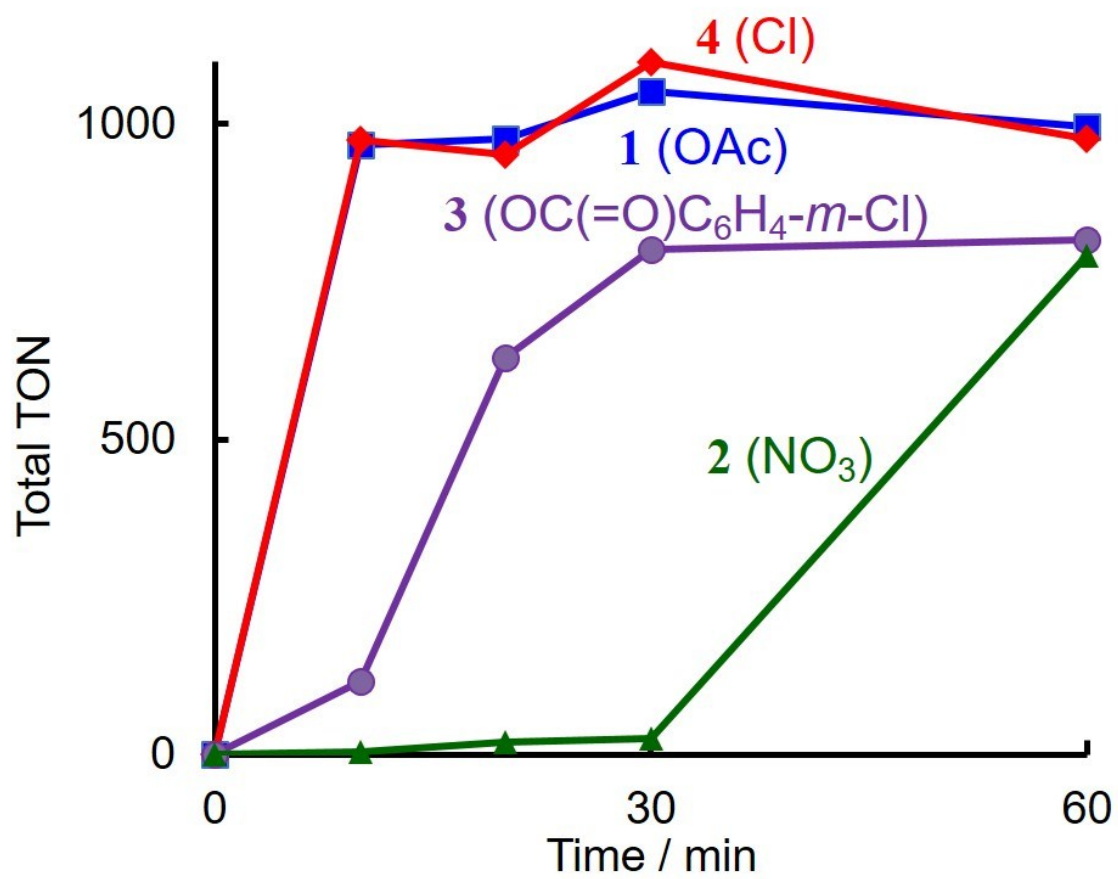

Fig. S7 Time course of total TON of the TOA<sup>Me2</sup> complexes 1 – 4 on cyclohexane oxidation

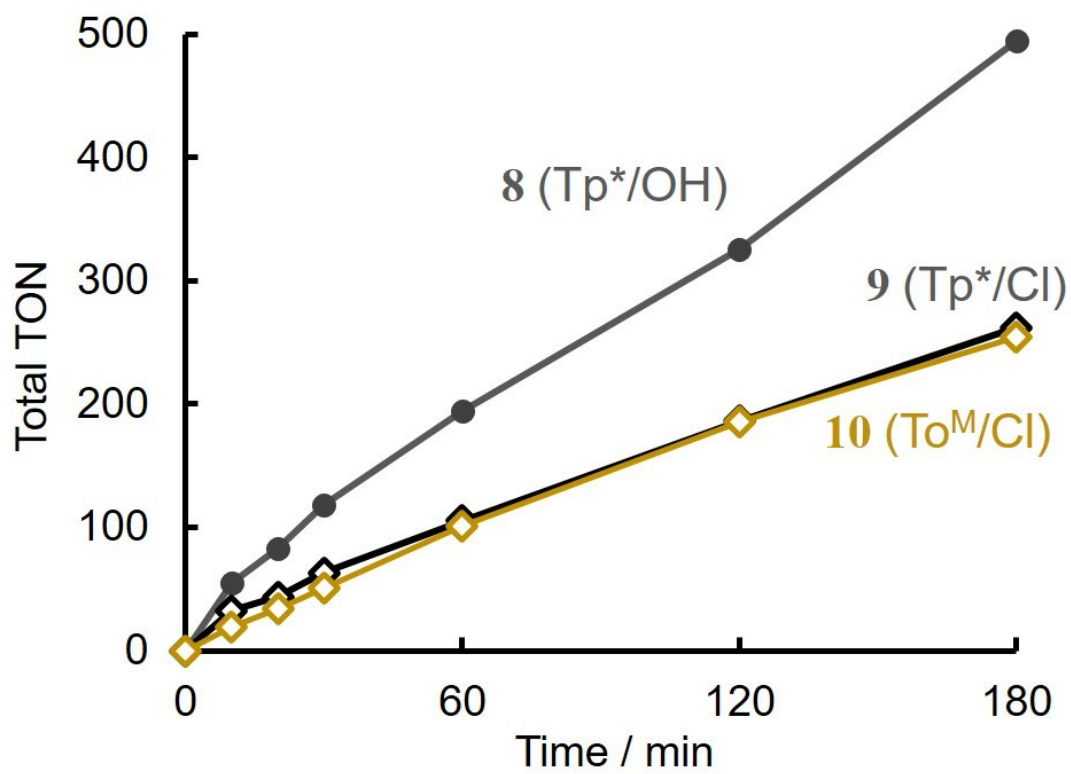

Fig. S8 Time course of total TON of the Tp\* and To<sup>M</sup> complexes **8** – **10** on cyclohexane oxidation

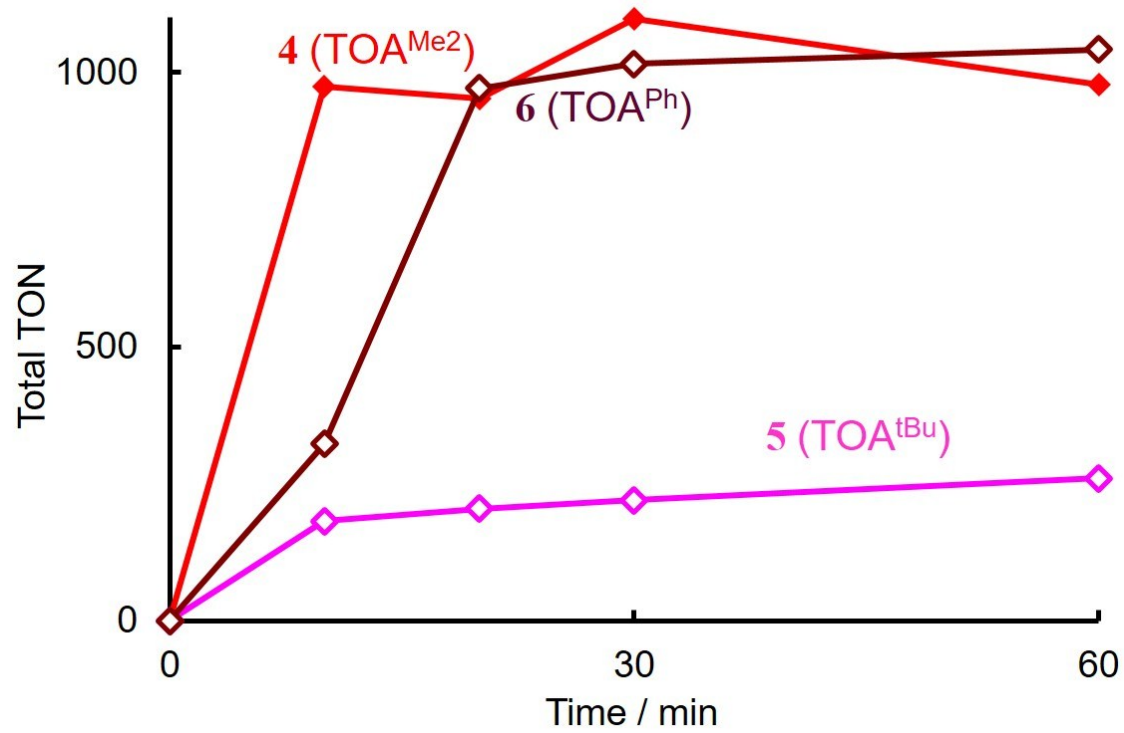

Fig. S9 Time course of total TON of the chlorido complexes 4 – 6 on cyclohexane oxidation



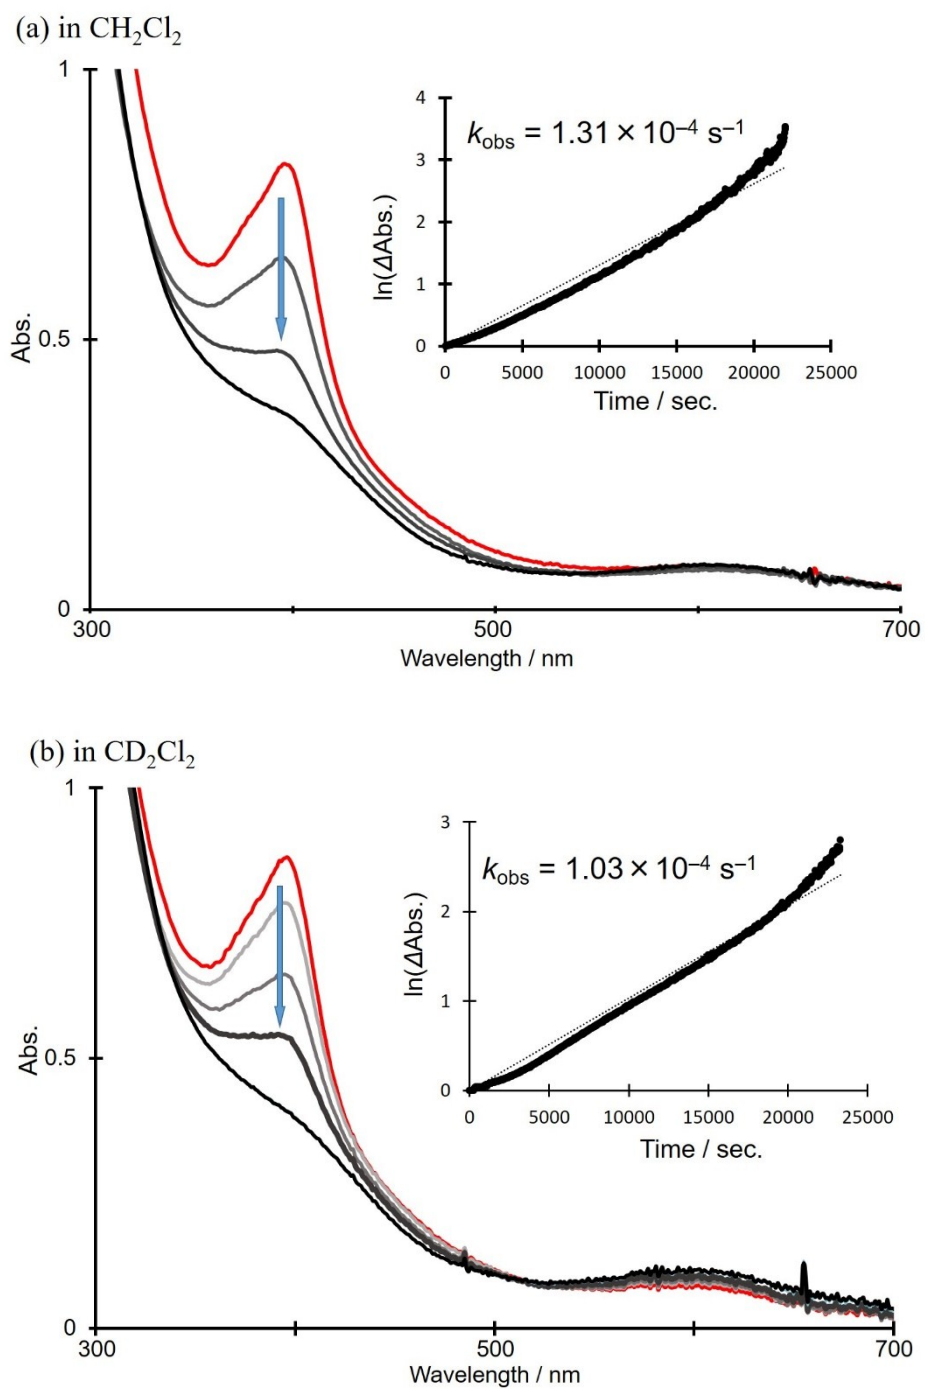

Fig. S10 Decay of the acylperoxido species in  $\text{CH}_2\text{Cl}_2$  (a) or  $\text{CD}_2\text{Cl}_2$  (b) at  $25^\circ\text{C}$ .
